# Supplementary material for: Optically-controlled closable microvalves for polymeric centrifugal microfluidic devices
Source: Royal Society of Chemistry journal article supplement (doi:10.1039/c9lc01187k), 2020-01-01
Supplement: c9lc01187k7.pdf [file c9lc01187k7.pdf]

|        | Mixing            |          | Elution           |          |
|--------|-------------------|----------|-------------------|----------|
|        | frequency<br>(Hz) | time (s) | frequency<br>(Hz) | time (s) |
| wash 1 | 33.3              | 10       | 25.0              | 10       |
| wash 2 | 33.3              | 10       | 25.0              | 10       |
| wash 3 | 33.3              | 10       | 25.0              | 10       |
| wash 4 | 33.3              | 10       | 33.3              | 5        |
