# Supplementary material for: Optically-controlled closable microvalves for polymeric centrifugal microfluidic devices
Source: Royal Society of Chemistry journal article supplement (doi:10.1039/c9lc01187k), 2020-01-01
Supplement: c9lc01187k10.pdf [file c9lc01187k10.pdf]

| Fraction | Hue (A.U.)  | Saturation (A. U.) |
|----------|-------------|--------------------|
| Waste 1  | 0.545±0.003 | 0.747±0.024        |
| Waste 2  | 0.388±0.052 | 0.069±0.024        |
| Waste 3  | 0.255±0.052 | 0.048±0.002        |
| Elution  | 0.205±0.013 | 0.049±0.003        |
| Water    | 0.213±0.015 | 0.048±0.009        |
