# Supplementary figures and images for: Optically-controlled closable microvalves for polymeric centrifugal microfluidic devices
Source: Royal Society of Chemistry journal article supplement (doi:10.1039/c9lc01187k), 2020-01-01

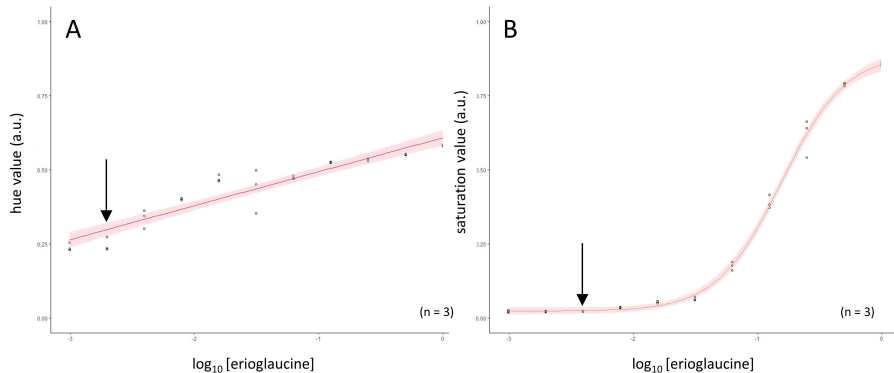

Supplement: c9lc01187k3.pdf [file c9lc01187k3.pdf]
